# Supplementary material for: Transport of Potentially Toxic Elements in Solid Particulate Matter during Flash Flood Events in Upper and Lower Stretch of the Sava River
Source: MDPI journal article supplement (doi:10.3390/w14081213), 2022-04-09
Supplement: s1 [file s1]

*Supplementary Material*

# Transport of Potentially Toxic Elements in Solid Particulate Matter During Flash Flood Events in Upper and Lower Stretch of the Sava River

Tea Zuliani <sup>1,2\*</sup>, Janja Vidmar <sup>1,2</sup>, Janez Ščančar <sup>1,2</sup>, Margareta Kračun Kolarević <sup>3</sup>, Stoimir Kolarević <sup>3</sup>, Momir Paunović <sup>3</sup> and Radmila Milačić <sup>1,2</sup>

<sup>1</sup> Department of Environmental Sciences, Jožef Stefan Institute, Jamova 39, 1000 Ljubljana, Slovenia; janja.vidmar@ijs.si (J.V.); janez.scancar@ijs.si (J.Š.); radmila.milacic@ijs.si (R.M.)

<sup>2</sup> Jožef Stefan International Postgraduate School, Jamova 39, 1000 Ljubljana, Slovenia

<sup>3</sup> Institute for Biological Research “Siniša Stanković”, University of Belgrade, Bulevar Despota Stefana 142, 11000 Belgrade, Serbia; margareta.kracun@ibiss.bg.ac.rs (M.K.K.); stoimir.kolarevic@ibiss.bg.ac.rs (S.K.); mpaunovi@ibiss.bg.ac.rs (M.P.)

\* Correspondence: tea.zuliani@ijs.si

**Citation:** Zuliani, T.; Vidmar, J.; Ščančar, J.; Kračun Kolarević, M.K.; Kolarević, S.; Paunović, M.; Milačić, R. Transport of Potentially Toxic Elements in Solid Particulate Matter During Flash Flood Events in Upper and Lower Stretch of the Sava River. *Water* **2022**, *14*, 1213. <https://doi.org/10.3390/w14081213>

Academic Editor: Heiko L. Schoenfuss

Received: 1 February 2022

Accepted: 4 April 2022

Published: 9 April 2022

**Publisher’s Note:** MDPI stays neutral with regard to jurisdictional claims in published maps and institutional affiliations.

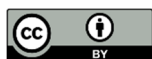

**Copyright:** © 2022 by the authors. Licensee MDPI, Basel, Switzerland. This article is an open access article distributed under the terms and conditions of the Creative Commons Attribution (CC BY) license (<https://creativecommons.org/licenses/by/4.0/>).

**Table S1.** Concentrations of Pb, Cd, As, Cu, Cr, Ni and Zn in the dissolved phase during the flood event at Litija sampling site.

| <b>Date and Time of Sampling</b> | <b>As<br/>(µg/L)</b> | <b>Cr<br/>(µg/L)</b> | <b>Cu<br/>(µg/L)</b> | <b>Ni<br/>(µg/L)</b> | <b>Zn<br/>(µg/L)</b> | <b>Cd<br/>(µg/L)</b> | <b>Pb<br/>(µg/L)</b> |
|----------------------------------|----------------------|----------------------|----------------------|----------------------|----------------------|----------------------|----------------------|
| 1.5.2016                         | 0.237                | 0.190                | 0.788                | 0.373                | 0.745                | <0.004               | <0.003               |
| 2.5.2016                         | 0.227                | 0.224                | 0.850                | 0.312                | 0.759                | <0.004               | <0.003               |
| 15.5.2016                        | 0.290                | 0.266                | 1.156                | 0.496                | 0.353                | <0.004               | <0.003               |
| 15.5.2016                        | 0.274                | 0.245                | 1.265                | 0.490                | 0.459                | <0.004               | <0.003               |
| 15.5.2016                        | 0.256                | 0.273                | 1.020                | 0.446                | 0.382                | <0.004               | <0.003               |
| 15.5.2016                        | 0.262                | 0.264                | 0.941                | 0.401                | 0.282                | <0.004               | <0.003               |
| 16.5.2016                        | 0.255                | 0.300                | 0.913                | 0.354                | 0.200                | <0.004               | <0.003               |
| 16.5.2016                        | 0.229                | 0.278                | 0.834                | 0.337                | 0.220                | <0.004               | <0.003               |
| 17.5.2016                        | 0.248                | 0.359                | 0.775                | 0.387                | 0.260                | <0.004               | <0.003               |
| 18.5.2016                        | 0.263                | 0.379                | 0.721                | 0.416                | 0.426                | <0.004               | <0.003               |
| 19.5.2016                        | 0.270                | 0.356                | 0.844                | 0.471                | 0.965                | <0.004               | <0.003               |
| 23.5.2016                        | 0.303                | 0.425                | 0.577                | 0.500                | 1.036                | <0.004               | <0.003               |

**Table S2.** Concentrations of Pb, Cd, As, Cu, Cr, Ni and Zn in the dissolved phase during the flood event Belgrade sampling site.

| <b>Date and Time of Sampling</b> | <b>As<br/>(µg/L)</b> | <b>Cd<br/>(µg/L)</b> | <b>Cr<br/>(µg/L)</b> | <b>Cu<br/>(µg/L)</b> | <b>Pb<br/>(µg/L)</b> | <b>Ni<br/>(µg/L)</b> | <b>Zn<br/>(µg/L)</b> |
|----------------------------------|----------------------|----------------------|----------------------|----------------------|----------------------|----------------------|----------------------|
| 08.03.2016 17-00                 | 0,84                 | <0.004               | 0,373                | 1,00                 | <0.003               | 1,90                 | 1,36                 |
| 09.03.2016 07-00                 | 0,96                 | <0.004               | 0,326                | 1,07                 | <0.003               | 1,97                 | 2,50                 |
| 09.03.2016 17-00                 | 1,43                 | <0.004               | 0,335                | 1,02                 | <0.003               | 1,05                 | 1,40                 |
| 10.03.2016 07-00                 | 1,22                 | <0.004               | 0,315                | 0,95                 | <0.003               | 1,18                 | 3,20                 |
| 10.03.2016 17-00                 | 1,49                 | <0.004               | 0,318                | 0,85                 | <0.003               | 0,90                 | 2,43                 |
| 11.03.2016. 07-00                | 1,10                 | <0.004               | 0,349                | 0,93                 | <0.003               | 1,02                 | 0,63                 |
| 11.03.2016. 17-00                | 1,04                 | <0.004               | 0,360                | 0,76                 | <0.003               | 1,08                 | 1,30                 |
| 12.03.2016 08-00                 | 0,86                 | <0.004               | 0,380                | 0,82                 | <0.003               | 1,48                 | 1,19                 |
| 12.03.2016. 17-00                | 0,92                 | <0.004               | 0,380                | 1,05                 | <0.003               | 1,49                 | 1,86                 |
| 13.03.2016 08-00                 | 0,91                 | <0.004               | 0,381                | 0,97                 | <0.003               | 1,49                 | 1,52                 |
| 13.03.2016. 17-00                | 0,93                 | <0.004               | 0,421                | 0,98                 | <0.003               | 1,38                 | 1,93                 |
| 16.03.2016 8-00                  | 0,94                 | <0.004               | 0,477                | 0,99                 | <0.003               | 1,29                 | 1,95                 |
| 18.03.2016. 17-00                | 0,87                 | <0.004               | 0,443                | 0,86                 | <0.003               | 1,05                 | 0,49                 |
| 22.03.2016 17-00                 | 0,80                 | <0.004               | 0,379                | 1,94                 | <0.003               | 1,11                 | 0,70                 |

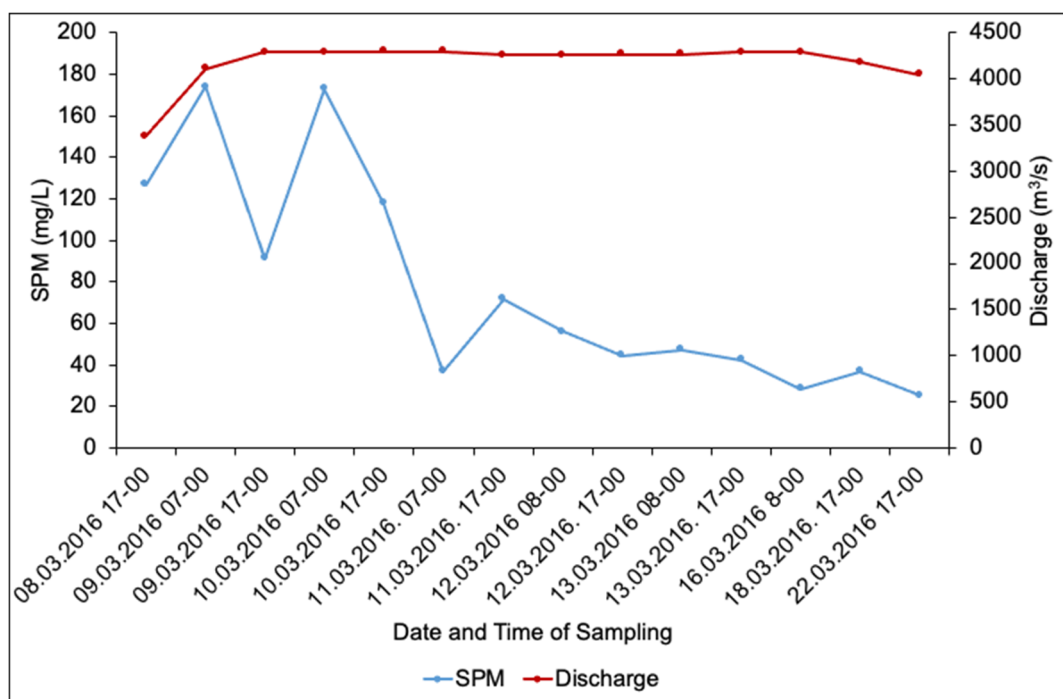

**Figure S1.** Amount of SPM *versus* discharge at Sremska Mitrovica, Serbia (70 km upstream Belgrade sampling point).
